# Supplementary material for: The Biodiversity of the Genus Dictyota: Phytochemical and Pharmacological Natural Products Prospectives
Source: MDPI journal article supplement (doi:10.3390/molecules27030672), 2022-01-20
Supplement: s1 [file s1]

**Table S1:** Pharmacological potential of compounds isolated from the genus *Dictyota*

| No. | Name                                      | Species                                                                                                                                              | Class     | Activity                            | References                             |
|-----|-------------------------------------------|------------------------------------------------------------------------------------------------------------------------------------------------------|-----------|-------------------------------------|----------------------------------------|
| 1   | Acutilol A                                | <i>D. acutiloba</i>                                                                                                                                  | Diterpene | Chemical defense                    | [11]                                   |
| 2   | Acutilol A acetate                        | <i>D. acutiloba</i>                                                                                                                                  | Diterpene | Chemical defense                    | [11]                                   |
| 3   | Acutilol B                                | <i>D. acutiloba</i>                                                                                                                                  | Diterpene | Chemical defense                    | [11]                                   |
| 4   | Dictyoxepin                               | <i>D. acutiloba</i><br><i>D. pinnatifida</i>                                                                                                         | Diterpene | Antimicrobial                       | [11, 113]                              |
| 5   | Dictyolene                                | <i>D. acutiloba</i>                                                                                                                                  | Diterpene | -                                   | [11]                                   |
| 6   | 9-Hydroxydolabelladien-6-one              | <i>D. bartayresiana</i>                                                                                                                              | Diterpene | -                                   | [13]                                   |
| 7   | 5-Acetoxy-12-hydroxydolabell-3,7Z-dienone | <i>D. bartayresiana</i>                                                                                                                              | Diterpene | -                                   | [13]                                   |
| 8   | 9-Acetoxydolabellatrien-16-al             | <i>D. bartayresiana</i>                                                                                                                              | Diterpene | -                                   | [13]                                   |
| 9   | 5-Acetoxy-12-hydroxydolabell-3,7E-dienone | <i>D. bartayresiana</i>                                                                                                                              | Diterpene | -                                   | [13]                                   |
| 10  | Trihydroxydolasta-2-en-6-one              | <i>D. bartayresiana</i>                                                                                                                              | Diterpene | -                                   | [13]                                   |
| 11  | Dictyol G acetate                         | <i>D. binghamiae</i> ,<br><i>D. dichotoma</i>                                                                                                        | Diterpene | -                                   | [18, 87]                               |
| 12  | Dictyoxide A                              | <i>D. binghamiae</i>                                                                                                                                 | Diterpene | -                                   | [18]                                   |
| 13  | Dictyotriol A diacetate                   | <i>D. binghamiae</i>                                                                                                                                 | Diterpene | -                                   | [18]                                   |
| 14  | Pachydictyol A                            | <i>D. binghamiae</i> ,<br><i>D. ciliolata</i> ,<br><i>D. dichotoma</i> ,<br><i>D. guineensis</i> ,<br><i>D. menstrualis</i> ,<br><i>D. mertensii</i> | Diterpene | Antiproliferative                   | [18, 21, 22, 25, 33, 61, 99, 105, 112] |
| 15  | Dictyoxid                                 | <i>D. binghamiae</i> ,<br><i>D. guineensi</i>                                                                                                        | Diterpene | -                                   | [18, 99]                               |
| 16  | Diacetal                                  | <i>D. binghamiae</i>                                                                                                                                 | Diterpene | -                                   | [18]                                   |
| 17  | Isopachydictyol                           | <i>D. caribaea</i> ,<br><i>D. dichotoma</i> ,<br><i>D. guineensis</i> ,<br><i>D. menstrualis</i> ,<br><i>D. mertensii</i>                            | Diterpene | Antimicrobial                       | [4, 21, 22, 33, 99, 105, 112]          |
| 18  | Dictyol B acetate                         | <i>D. caribaea</i> ,<br><i>D. ciliolata</i> ,<br><i>D. dichotoma</i> ,<br><i>D. mertensi</i>                                                         | Diterpene | Antiproliferative,<br>Antimicrobial | [21, 22, 25, 62, 112]                  |
| 19  | Dichotomanol                              | <i>D. caribaea</i>                                                                                                                                   | Diterpene | -                                   | [21, 22]                               |
| 20  | Dichotomanol acetate                      | <i>D. caribaea</i>                                                                                                                                   | Diterpene | -                                   | [21, 22]                               |
| 21  | Cycloxenianol acetate                     | <i>D. caribaea</i>                                                                                                                                   | Diterpene | -                                   | [21, 22]                               |
| 22  | Ciliolatale                               | <i>D. ciliolata</i>                                                                                                                                  | Diterpene | Antifungal                          | [23]                                   |
| 23  | 17-Acetoxy-dictyodial                     | <i>D. ciliolata</i>                                                                                                                                  | Diterpene | Antifungal                          | [23]                                   |

|    |                                                                                                                 |                                                                                                                                                   |                   |                                                                                       |                                       |
|----|-----------------------------------------------------------------------------------------------------------------|---------------------------------------------------------------------------------------------------------------------------------------------------|-------------------|---------------------------------------------------------------------------------------|---------------------------------------|
| 24 | Dictyol C                                                                                                       | <i>D. ciliolata</i> ,<br><i>D. dichotoma</i> ,<br><i>D. fasciola</i> ,<br><i>D. menstrualis</i> ,<br><i>D. mertensii</i> ,<br><i>Dictyota</i> sp. | Diterpene         | Antifungal,<br>Anti-inflammatory<br>Antimicrobial,<br>Antioxidant,<br>Neuroprotective | [23, 33, 72,<br>92, 103,<br>112, 127] |
| 25 | Dictyol H                                                                                                       | <i>D. ciliolata</i>                                                                                                                               | Diterpene         | Antifungal                                                                            | [23]                                  |
| 26 | Dictyodial                                                                                                      | <i>D. ciliolata</i> ,<br><i>D. flabellata</i>                                                                                                     | Diterpene         | Antifungal                                                                            | [23, 33, 96]                          |
| 27 | 3- <i>O</i> -(6'-deoxy-6'-sulfo- $\alpha$ -D-glucopyranosyl)-1- <i>O</i> -oleoyl-2- <i>O</i> -palmitoylglycerol | <i>D. ciliolata</i>                                                                                                                               | Sulfonoglycolipid | -                                                                                     | [24]                                  |
| 28 | Dictyospiromide                                                                                                 | <i>D. coriacea</i>                                                                                                                                | Alkaloid          | Antioxidant                                                                           | [26]                                  |
| 29 | 1,9-Dihydroxycrenulide                                                                                          | <i>D. coriacea</i>                                                                                                                                | Diterpene         | Hypopigmentation                                                                      | [27]                                  |
| 30 | Epiloliolide                                                                                                    | <i>D. coriacea</i>                                                                                                                                | Diterpene         | Hypopigmentation                                                                      | [27]                                  |
| 31 | D-Mannitol                                                                                                      | <i>D. coriacea</i>                                                                                                                                | Carbohydrate      | -                                                                                     | [27]                                  |
| 32 | 4 $\beta$ -Hydroxydictyodial A                                                                                  | <i>D. crenulata</i>                                                                                                                               | Diterpene         | -                                                                                     | [30, 33]                              |
| 33 | Acetoxycrenulide                                                                                                | <i>D. crenulata</i> ,<br><i>D. menstrualis</i>                                                                                                    | Diterpene         | Anti-inflammatory,<br>Antimicrobial                                                   | [31, 54,<br>103]                      |
| 34 | Dictyocrenulol                                                                                                  | <i>D. crenulata</i>                                                                                                                               | Diterpene         | -                                                                                     | [31]                                  |
| 35 | $\beta$ -Crenulal                                                                                               | <i>D. crenulata</i>                                                                                                                               | Diterpene         | -                                                                                     | [32]                                  |
| 36 | Sanadaol                                                                                                        | <i>D. crenulata</i> ,<br><i>D. dichotoma</i> ,<br><i>D. fasciola</i>                                                                              | Diterpene         | Algicidal                                                                             | [32, 48, 92]                          |
| 37 | Acetyldictyolal                                                                                                 | <i>D. dichotoma</i> ,<br><i>D. fasciola</i>                                                                                                       | Diterpene         | -                                                                                     | [43, 92]                              |
| 38 | Hydroxyacetyldictyolal                                                                                          | <i>D. dichotoma</i>                                                                                                                               | Diterpene         | -                                                                                     | [43]                                  |
| 39 | Isodictyohemiacetal                                                                                             | <i>D. dichotoma</i>                                                                                                                               | Diterpene         | -                                                                                     | [43]                                  |
| 40 | Dictydiacetal                                                                                                   | <i>D. dichotoma</i>                                                                                                                               | Diterpene         | -                                                                                     | [43]                                  |
| 41 | 4-Acetoxydictyolactone                                                                                          | <i>D. dichotoma</i>                                                                                                                               | Diterpene         | -                                                                                     | [44]                                  |
| 42 | Dictyotalide A                                                                                                  | <i>D. dichotoma</i>                                                                                                                               | Diterpene         | -                                                                                     | [44]                                  |
| 43 | Dictyotalide B                                                                                                  | <i>D. dichotoma</i>                                                                                                                               | Diterpene         | -                                                                                     | [44]                                  |
| 44 | Nordictyotalide                                                                                                 | <i>D. dichotoma</i>                                                                                                                               | Diterpene         | -                                                                                     | [44]                                  |
| 45 | <i>ent</i> -Erogorgiaene                                                                                        | <i>D. dichotoma</i>                                                                                                                               | Diterpene         | -                                                                                     | [45]                                  |
| 46 | 1,5-Cyclo-tetrahydroerogorgiaene                                                                                | <i>D. dichotoma</i>                                                                                                                               | Diterpene         | -                                                                                     | [45]                                  |
| 47 | Acetoxy-hydroxy-dolabella-3,7-dien-9-one                                                                        | <i>D. dichotoma</i>                                                                                                                               | Diterpene         | -                                                                                     | [46]                                  |
| 48 | 3,4-Epoxy-hydroxy-dolabella-7-en-9-one                                                                          | <i>D. dichotoma</i>                                                                                                                               | Diterpene         | -                                                                                     | [46]                                  |
| 49 | 7,8-Epoxy-hydroxy-dolabella-3-en-9-one                                                                          | <i>D. dichotoma</i>                                                                                                                               | Diterpene         | -                                                                                     | [46]                                  |
| 50 | 9-Acetoxydolabella-3,7,12-trien-16-al                                                                           | <i>D. dichotoma</i>                                                                                                                               | Diterpene         | -                                                                                     | [46]                                  |

|    |                                                                                                                                                                                     |                                                |           |                                     |           |
|----|-------------------------------------------------------------------------------------------------------------------------------------------------------------------------------------|------------------------------------------------|-----------|-------------------------------------|-----------|
| 51 | 9-Acetoxydolabellatrien-16-oic acid                                                                                                                                                 | <i>D. dichotoma</i>                            | Diterpene | -                                   | [46]      |
| 52 | 9-Acetoxydolabella-3,7-dien-12-ol                                                                                                                                                   | <i>D. dichotoma</i>                            | Diterpene | -                                   | [46]      |
| 53 | 9-Acetoxy-7,8-epoxydolabella-3-en-12-ol                                                                                                                                             | <i>D. dichotoma</i>                            | Diterpene | -                                   | [46]      |
| 54 | 9-Hydroxydolest-1,3-dien-6-one                                                                                                                                                      | <i>D. dichotoma</i>                            | Diterpene | -                                   | [46]      |
| 55 | 4,12-Dihydroxydolabella-2,7Z-dien-9-one                                                                                                                                             | <i>D. dichotoma</i>                            | Diterpene | -                                   | [46]      |
| 56 | 4,12-Dihydroxydolabella-2,7E-dien-9-one                                                                                                                                             | <i>D. dichotoma</i>                            | Diterpene | -                                   | [46]      |
| 57 | 12-Hydroxydolabella-3,7E-dien-9-one                                                                                                                                                 | <i>D. dichotoma</i>                            | Diterpene | -                                   | [46]      |
| 58 | 12-Hydroxydolabella-3,7Z-dien-9-one                                                                                                                                                 | <i>D. dichotoma</i>                            | Diterpene | -                                   | [46]      |
| 59 | 4,12-Dihydroxydolabellan-2,6-dien-9-one                                                                                                                                             | <i>D. dichotoma</i>                            | Diterpene | -                                   | [46]      |
| 60 | 4,12-Dihydroxydolabellan-2,6-dien-9-one                                                                                                                                             | <i>D. dichotoma</i>                            | Diterpene | -                                   | [46]      |
| 61 | 12Z-Hydroxydolabella-3,6-dien-9-one                                                                                                                                                 | <i>D. dichotoma</i>                            | Diterpene | -                                   | [46]      |
| 62 | 12E-Hydroxydolabella-3,6-dien-9-one                                                                                                                                                 | <i>D. dichotoma</i>                            | Diterpene | -                                   | [46]      |
| 63 | 5,6,18-Triacetoxy-hydroxy-dolabelladiene                                                                                                                                            | <i>D. dichotoma</i>                            | Diterpene | -                                   | [4]       |
| 64 | 18-Acetoxy-10-hydroxy-2,7-dolabelladiene                                                                                                                                            | <i>D. dichotoma</i>                            | Diterpene | -                                   | [4]       |
| 65 | 5-Acetoxy-dihydroxy-2,7-dolabelladiene                                                                                                                                              | <i>D. dichotoma</i>                            | Diterpene | -                                   | [4]       |
| 66 | 7,8-Epoxy-3,18-dolabelladiene                                                                                                                                                       | <i>D. dichotoma</i>                            | Diterpene | -                                   | [4]       |
| 67 | 18-Acetoxy-2,7-dolabelladiene                                                                                                                                                       | <i>D. dichotoma</i>                            | Diterpene | -                                   | [4]       |
| 68 | Dictyotatriol A                                                                                                                                                                     | <i>D. dichotoma</i>                            | Diterpene | -                                   | [4]       |
| 69 | Dictyotin A                                                                                                                                                                         | <i>D. dichotoma</i> ,<br><i>D. menstrualis</i> | Diterpene | Anti-inflammatory,<br>Antimicrobial | [47, 103] |
| 70 | Dictyotin B                                                                                                                                                                         | <i>D. dichotoma</i>                            | Diterpene | -                                   | [47]      |
| 71 | Dictyotin C                                                                                                                                                                         | <i>D. dichotoma</i>                            | Diterpene | -                                   | [47]      |
| 72 | (1 <i>R</i> ,4 <i>S</i> ,4 <i>αR</i> ,8 <i>αR</i> )-1,6-Dimethyl-4-[(2 <i>R</i> )-6-methylhept-5-en-2-yl]-1,2,3,4,4 <i>α</i> ,7,8,8 <i>α</i> -octahydronaphthalen-1-yl methyl ether | <i>D. dichotoma</i>                            | Diterpene | -                                   | [47]      |
| 73 | Dictyotin D methyl ether                                                                                                                                                            | <i>D. dichotoma</i>                            | Diterpene | -                                   | [47]      |
| 74 | Dictyol J                                                                                                                                                                           | <i>D. dichotoma</i>                            | Diterpene | Algicidal                           | [48]      |
| 75 | Dictyolactone                                                                                                                                                                       | <i>D. dichotoma</i> ,<br><i>D. flabellata</i>  | Diterpene | Algicidal                           | [48, 96]  |

|     |                                                   |                                              |           |               |      |
|-----|---------------------------------------------------|----------------------------------------------|-----------|---------------|------|
| 76  | Dictyol A                                         | <i>D. dichotoma</i>                          | Diterpene | -             | [49] |
| 77  | Dictyol B                                         | <i>D. dichotoma</i> ,<br><i>D. mertensii</i> | Diterpene | Antimicrobial | [49] |
| 78  | Dictyol F                                         | <i>D. dichotoma</i>                          | Diterpene | -             | [50] |
| 79  | Epidictyol F                                      | <i>D. dichotoma</i>                          | Diterpene | -             | [50] |
| 80  | Dihydromethoxy-pachydictyol A                     | <i>D. dichotoma</i>                          | Diterpene | -             | [50] |
| 81  | 14,15-Epoxy-pachydictyol A                        | <i>D. dichotoma</i>                          | Diterpene | -             | [50] |
| 82  | 2,6-Cycloether pachydictyol A                     | <i>D. dichotoma</i>                          | Diterpene | -             | [50] |
| 83  | 9 <i>R</i> -Hydroxydichotoma-2,14-dien-19,20-diol | <i>D. dichotoma</i>                          | Diterpene | -             | [51] |
| 84  | 9 <i>R</i> -Acetoxydichotoma-2,14-dien-19,20-diol | <i>D. dichotoma</i>                          | Diterpene | -             | [51] |
| 85  | 7-Hydroxy-2,6-cyclohexadien-18,19-diol            | <i>D. dichotoma</i>                          | Diterpene | -             | [51] |
| 86  | 7-Acetoxy-2,6-cyclohexadien-18,19-diol            | <i>D. dichotoma</i>                          | Diterpene | -             | [51] |
| 87  | Crenulacetal A                                    | <i>D. dichotoma</i>                          | Diterpene | -             | [52] |
| 88  | Crenulacetal B                                    | <i>D. dichotoma</i>                          | Diterpene | -             | [52] |
| 89  | Crenulacetal C                                    | <i>D. dichotoma</i>                          | Diterpene | -             | [52] |
| 90  | Crenulacetal D                                    | <i>D. dichotoma</i>                          | Diterpene | -             | [52] |
| 91  | Dichotone                                         | <i>D. dichotoma</i>                          | Diterpene | -             | [53] |
| 92  | Dichotodione                                      | <i>D. dichotoma</i>                          | Diterpene | -             | [53] |
| 93  | Dictyohydroperoxide                               | <i>D. dichotoma</i>                          | Diterpene | -             | [54] |
| 94  | Hydroperoxyacetoxycrenulide                       | <i>D. dichotoma</i>                          | Diterpene | -             | [54] |
| 95  | Dictymal                                          | <i>D. dichotoma</i>                          | Diterpene | -             | [55] |
| 96  | Dichotenone A                                     | <i>D. dichotoma</i>                          | Diterpene | -             | [56] |
| 97  | Dichotenone B                                     | <i>D. dichotoma</i>                          | Diterpene | -             | [56] |
| 98  | Loliolide                                         | <i>D. dichotoma</i>                          | Diterpene | -             | [56] |
| 99  | Dichotenol A                                      | <i>D. dichotoma</i>                          | Diterpene | -             | [57] |
| 100 | Dichotenol B                                      | <i>D. dichotoma</i>                          | Diterpene | -             | [57] |
| 101 | Dichotenol C                                      | <i>D. dichotoma</i>                          | Diterpene | -             | [57] |
| 102 | Dictytriene A                                     | <i>D. dichotoma</i>                          | Diterpene | -             | [58] |
| 103 | Dictytriene B                                     | <i>D. dichotoma</i>                          | Diterpene | -             | [58] |
| 104 | Dictyone                                          | <i>D. dichotoma</i>                          | Diterpene | -             | [58] |
| 105 | Dictytriol                                        | <i>D. dichotoma</i>                          | Diterpene | -             | [58] |
| 106 | Tricyclodictyofuran A                             | <i>D. dichotoma</i>                          | Diterpene | -             | [59] |
| 107 | Tricyclodictyofuran B                             | <i>D. dichotoma</i>                          | Diterpene | -             | [59] |
| 108 | Tricyclodictyofuran C                             | <i>D. dichotoma</i>                          | Diterpene | -             | [59] |
| 109 | Dictyoxetane                                      | <i>D. dichotoma</i>                          | Diterpene | -             | [60] |
| 110 | Pachydictyol B                                    | <i>D. dichotoma</i>                          | Diterpene | -             | [61] |

|     |                                                              |                                                                                               |                         |                                     |                      |
|-----|--------------------------------------------------------------|-----------------------------------------------------------------------------------------------|-------------------------|-------------------------------------|----------------------|
| 111 | Pachydietylol C                                              | <i>D. dichotoma</i> ,<br><i>D. spiralis</i>                                                   | Diterpene               | Anti-trypanosomal,<br>Cytotoxic     | [61, 126]            |
| 112 | Dictyol E                                                    | <i>D. dichotoma</i> ,<br><i>D. fasciola</i> ,<br><i>D. guineensis</i> ,<br><i>D. spiralis</i> | Diterpene               | Anti-trypanosomal,<br>Cytotoxic     | [61, 92, 99,<br>126] |
| 113 | <i>cis</i> -Africanan-1 $\alpha$ -ol                         | <i>D. dichotoma</i>                                                                           | Diterpene               | -                                   | [61]                 |
| 114 | Fucosterol                                                   | <i>D. dichotoma</i>                                                                           | Sterol                  | Antiproliferative,<br>Antimicrobial | [61, 63, 65]         |
| 115 | 2,2,6,7-Tetramethyl-10-oxatricyclo[4.3.0.1(1,7)]-decan-5-one | <i>D. dichotoma</i>                                                                           | Oxatricyclic derivative | -                                   | [61]                 |
| 116 | <i>N</i> -(4-bromo- <i>n</i> -butyl)-piperidin-2-one         | <i>D. dichotoma</i>                                                                           | Halogenated derivative  | -                                   | [61]                 |
| 117 | <i>tert</i> -Hexadecanethiol                                 | <i>D. dichotoma</i>                                                                           | Thiol derivative        | -                                   | [61]                 |
| 118 | Dictyotadiol                                                 | <i>D. dichotoma</i> ,<br><i>D. guineensis</i>                                                 | Diterpene               | -                                   | [62, 99]             |
| 119 | Coprostanol                                                  | <i>D. dichotoma</i>                                                                           | Sterol                  | -                                   | [63]                 |
| 120 | Epicoprostanol                                               | <i>D. dichotoma</i>                                                                           | Sterol                  | -                                   | [63]                 |
| 121 | Campesterol                                                  | <i>D. dichotoma</i>                                                                           | Sterol                  | -                                   | [63]                 |
| 122 | Stigmasterol                                                 | <i>D. dichotoma</i>                                                                           | Sterol                  | -                                   | [63]                 |
| 123 | $\beta$ -Sitosterol                                          | <i>D. dichotoma</i>                                                                           | Sterol                  | -                                   | [63]                 |
| 124 | Cholesterol                                                  | <i>D. dichotoma</i>                                                                           | Sterol                  | -                                   | [63]                 |
| 125 | Brassicasterol                                               | <i>D. dichotoma</i>                                                                           | Sterol                  | -                                   | [63]                 |
| 126 | Cholestanol                                                  | <i>D. dichotoma</i>                                                                           | Sterol                  | -                                   | [63]                 |
| 127 | 5 $\beta$ -Cholestan-3-one                                   | <i>D. dichotoma</i>                                                                           | Sterol                  | -                                   | [63]                 |
| 128 | 1-Octanol                                                    | <i>D. dichotoma</i>                                                                           | Aldehyde                | -                                   | [65]                 |
| 129 | p-Cresol                                                     | <i>D. dichotoma</i>                                                                           | Aromatic derivative     | -                                   | [65]                 |
| 130 | 2,6-Nonadienal                                               | <i>D. dichotoma</i>                                                                           | Aldehyde                | -                                   | [65]                 |
| 131 | Trans-anethole                                               | <i>D. dichotoma</i>                                                                           | Aromatic derivative     | -                                   | [65]                 |
| 132 | $\alpha$ -Cubebene                                           | <i>D. dichotoma</i>                                                                           | Diterpene               | -                                   | [65, 66]             |
| 133 | $\beta$ -Bourbonene                                          | <i>D. dichotoma</i>                                                                           | Diterpene               | -                                   | [65, 66]             |
| 134 | $\beta$ -Cubebene                                            | <i>D. dichotoma</i>                                                                           | Sesquiterpene           | -                                   | [65, 66]             |
| 135 | $\gamma$ -Gurjurene                                          | <i>D. dichotoma</i>                                                                           | Sesquiterpene           | -                                   | [65]                 |
| 136 | Germacrene D                                                 | <i>D. dichotoma</i>                                                                           | Sesquiterpene           | -                                   | [65, 66]             |
| 137 | $\alpha$ -Muurolene                                          | <i>D. dichotoma</i>                                                                           | Sesquiterpene           | -                                   | [65, 66]             |
| 138 | $\alpha$ -Amorphene                                          | <i>D. dichotoma</i>                                                                           | Sesquiterpene           | -                                   | [65, 66]             |
| 139 | $\delta$ -Cadenene                                           | <i>D. dichotoma</i>                                                                           | Sesquiterpene           | -                                   | [65, 66]             |
| 140 | <i>cis</i> -Calamenene                                       | <i>D. dichotoma</i>                                                                           | Sesquiterpene           | -                                   | [65, 66]             |
| 141 | $\alpha$ -Calacorene                                         | <i>D. dichotoma</i>                                                                           | Sesquiterpene           | -                                   | [65, 66]             |
| 142 | $\beta$ -Sesquiphellandrene                                  | <i>D. dichotoma</i>                                                                           | Sesquiterpene           | -                                   | [66]                 |

|            |                                           |                                            |                      |                   |          |
|------------|-------------------------------------------|--------------------------------------------|----------------------|-------------------|----------|
| <b>143</b> | $\alpha$ -Cadinol                         | <i>D. dichotoma</i>                        | Sesquiterpene        | -                 | [66]     |
| <b>144</b> | Cembrene                                  | <i>D. dichotoma</i>                        | Sesquiterpene        | -                 | [66]     |
| <b>145</b> | Cycloisosativene                          | <i>D. dichotoma</i>                        | Sesquiterpene        | -                 | [66]     |
| <b>146</b> | $\tau$ -Murolol                           | <i>D. dichotoma</i>                        | Sesquiterpene        | -                 | [66]     |
| <b>147</b> | $\alpha$ -Ylangene                        | <i>D. dichotoma</i>                        | Sesquiterpene        | -                 | [66]     |
| <b>148</b> | $\delta$ -Selinene                        | <i>D. dichotoma</i>                        | Sesquiterpene        | -                 | [66]     |
| <b>149</b> | $\alpha$ -Copaene                         | <i>D. dichotoma</i>                        | Sesquiterpene        | -                 | [66]     |
| <b>150</b> | Aromadendrene                             | <i>D. dichotoma</i>                        | Sesquiterpene        | -                 | [66]     |
| <b>151</b> | (E)- $\beta$ -Farnesene                   | <i>D. dichotoma</i>                        | Hydrocarbon          | -                 | [66]     |
| <b>152</b> | $\alpha$ -Curcumene                       | <i>D. dichotoma</i>                        | Aromatic derivatives | -                 | [66]     |
| <b>153</b> | Bicyclogermacrene                         | <i>D. dichotoma</i>                        | Sesquiterpene        | -                 | [66]     |
| <b>154</b> | Epizonarene                               | <i>D. dichotoma</i>                        | Sesquiterpene        | -                 | [66]     |
| <b>155</b> | $\gamma$ -Cadinene                        | <i>D. dichotoma</i>                        | Sesquiterpene        | -                 | [66]     |
| <b>156</b> | $\gamma$ -Murolene                        | <i>D. dichotoma</i>                        | Sesquiterpene        | -                 | [66]     |
| <b>157</b> | Germacrene B                              | <i>D. dichotoma</i>                        | Sesquiterpene        | -                 | [66]     |
| <b>158</b> | <i>trans</i> -Cadina-1,4-diene            | <i>D. dichotoma</i>                        | Sesquiterpene        | -                 | [66]     |
| <b>159</b> | 1,8-Cineole                               | <i>D. dichotoma</i>                        | Sesquiterpene        | -                 | [66]     |
| <b>160</b> | 6-Hydroxydolabella-3,7,12-triene          | <i>D. dichotoma</i> var. <i>divaricata</i> | Diterpene            | -                 | [67]     |
| <b>161</b> | 9-Hydroxyisodolasta-1,3,5(14)-trienone    | <i>D. dichotoma</i> var. <i>divaricata</i> | Diterpene            | Antiproliferative | [67, 72] |
| <b>162</b> | 9-Hydroxydolasta-1,3-diene                | <i>D. dichotoma</i> var. <i>divaricata</i> | Diterpene            | -                 | [67]     |
| <b>163</b> | 3,4-Epoxy-6-hydroxydolabella-7,12-diene   | <i>D. dichotoma</i> var. <i>divaricata</i> | Diterpene            | -                 | [67]     |
| <b>164</b> | 12-Hydroxydolabella-3Z,7Z-dien-2-one      | <i>D. dichotoma</i> var. <i>divaricata</i> | Diterpene            | -                 | [67]     |
| <b>165</b> | 9,13-Dihydroxydolasta-1,3-diene           | <i>D. dichotoma</i> var. <i>divaricata</i> | Diterpene            | -                 | [67]     |
| <b>166</b> | 13-Acetoxy-9-hydroxydolasta-1,3-diene     | <i>D. dichotoma</i> var. <i>divaricata</i> | Diterpene            | -                 | [67]     |
| <b>167</b> | 9-Hydroxydolasta-1,3-dien-13-one          | <i>D. dichotoma</i> var. <i>divaricata</i> | Diterpene            | -                 | [67]     |
| <b>168</b> | 17,18:18,19-Bisepoxyxenic-methoxy-triene  | <i>D. dichotoma</i> var. <i>divaricata</i> | Diterpene            | -                 | [68]     |
| <b>169</b> | 3 $\beta$ -Hydroxydilophol                | <i>D. dichotoma</i> var. <i>divaricata</i> | Diterpene            | -                 | [68]     |
| <b>170</b> | 18-Hydroxy-2,7-dolabelladiene             | <i>D. dichotoma</i> var. <i>divaricata</i> | Diterpene            | -                 | [68]     |
| <b>171</b> | 4,17-Hydroxyxenic-trienaloic acid lactone | <i>D. dichotoma</i> var. <i>divaricata</i> | Diterpene            | -                 | [69]     |
| <b>172</b> | 17-Xenic-trien-1-al-18-oic acid lactone   | <i>D. dichotoma</i> var. <i>divaricata</i> | Diterpene            | -                 | [69]     |

|            |                                                                                                                                                                                                                                          |                                            |           |   |          |
|------------|------------------------------------------------------------------------------------------------------------------------------------------------------------------------------------------------------------------------------------------|--------------------------------------------|-----------|---|----------|
| <b>173</b> | Epoxyxenic-hydroxydienaloic acid lactone                                                                                                                                                                                                 | <i>D. dichotoma</i> var. <i>divaricata</i> | Diterpene | - | [69]     |
| <b>174</b> | 17-Acetoxyxenic-4-hydroxy-trien-dial                                                                                                                                                                                                     | <i>D. dichotoma</i> var. <i>divaricata</i> | Diterpene | - | [69]     |
| <b>175</b> | 17-Acetoxy-4 $\alpha$ -hydrocrenulide                                                                                                                                                                                                    | <i>D. dichotoma</i> var. <i>divaricata</i> | Diterpene | - | [69]     |
| <b>176</b> | Deacetoxydictyol H                                                                                                                                                                                                                       | <i>D. dichotoma</i> var. <i>divaricata</i> | Diterpene | - | [69]     |
| <b>177</b> | 2-Hydroxydictyoxide                                                                                                                                                                                                                      | <i>D. dichotoma</i> var. <i>divaricata</i> | Diterpene | - | [69]     |
| <b>178</b> | (3 $\alpha$ S,4 $\alpha$ R,8S,8 $\alpha$ S)-4 $\alpha$ -Hydroxy-3 $\alpha$ ,8 $\alpha$ -dimethyl-5-methylidene-1-(propan-2-yl)-3,3 $\alpha$ ,4,4 $\alpha$ ,5,6,7,8,8 $\alpha$ ,9-decahydrobenzo[f]azulen-8-yl acetate                    | <i>D. dichotoma</i> var. <i>divaricata</i> | Diterpene | - | [70]     |
| <b>179</b> | (3 $\alpha$ S,4 $\alpha$ R,8S,8 $\alpha$ S,10S)-4 $\alpha$ ,8-Dihydroxy-3 $\alpha$ ,8 $\alpha$ -dimethyl-5-methylidene-1-(propan-2-yl)-2,3,3 $\alpha$ ,4,4 $\alpha$ ,5,6,7,8,8 $\alpha$ ,9,10-dodecahydrobenzo[f]azulen-10-yl acetate    | <i>D. dichotoma</i> var. <i>divaricata</i> | Diterpene | - | [70]     |
| <b>180</b> | (3 $\alpha$ S,4 $\alpha$ R,8S,8 $\alpha$ S,10S)-4 $\alpha$ -Hydroxy-3 $\alpha$ ,8 $\alpha$ -dimethyl-5-methylidene-1-(propan-2-yl)-2,3,3 $\alpha$ ,4,4 $\alpha$ ,5,6,7,8,8 $\alpha$ ,9,10-dodecahydrobenzo[f]azulene-8,10-diyl diacetate | <i>D. dichotoma</i> var. <i>divaricata</i> | Diterpene | - | [70]     |
| <b>181</b> | 4 $\alpha$ -Hydroxy-3 $\alpha$ ,8 $\alpha$ -dimethyl-5-methylidene-1-(propan-2-yl)-2,3,3 $\alpha$ ,4,4 $\alpha$ ,5,6,7,8,8 $\alpha$ ,9,10-dodecahydrobenzo[f]azulen-10-yl acetate                                                        | <i>D. dichotoma</i> var. <i>divaricata</i> | Diterpene | - | [70]     |
| <b>182</b> | Divarinone                                                                                                                                                                                                                               | <i>D. dichotoma</i> var. <i>divaricata</i> | Diterpene | - | [71]     |
| <b>183</b> | Dolabellatrienol                                                                                                                                                                                                                         | <i>D. dichotoma</i> var. <i>implexa</i>    | Diterpene | - | [72]     |
| <b>184</b> | Amijiol acetate                                                                                                                                                                                                                          | <i>D. dichotoma</i> var. <i>implexa</i>    | Diterpene | - | [72]     |
| <b>185</b> | Dolastane amijiol-7-10-diacetate                                                                                                                                                                                                         | <i>D. dichotoma</i> var. <i>implexa</i>    | Diterpene | - | [72]     |
| <b>186</b> | 8 $\beta$ -Hydroxy-pachydictyol A                                                                                                                                                                                                        | <i>D. dichotoma</i> var. <i>implexa</i>    | Diterpene | - | [72]     |
| <b>187</b> | Amijiol                                                                                                                                                                                                                                  | <i>D. dichotoma</i> var. <i>implexa</i>    | Diterpene | - | [72, 82] |
| <b>188</b> | Dictyol I acetate                                                                                                                                                                                                                        | <i>D. dichotoma</i> var. <i>implexa</i>    | Diterpene | - | [73]     |



|            |                                                                                                                                          |                                            |            |                   |          |
|------------|------------------------------------------------------------------------------------------------------------------------------------------|--------------------------------------------|------------|-------------------|----------|
| <b>189</b> | Indicol                                                                                                                                  | <i>D. dichotoma</i> var. <i>indica</i>     | Diterpene  | Antiproliferative | [74]     |
| <b>190</b> | Indicarol acetate                                                                                                                        | <i>D. dichotoma</i> var. <i>indica</i> .   | Diterpene  | -                 | [74]     |
| <b>191</b> | Isolinearol                                                                                                                              | <i>D. dichotoma</i> var. <i>indica</i>     | Diterpene  | -                 | [74]     |
| <b>192</b> | Linearol                                                                                                                                 | <i>D. dichotoma</i> var. <i>indica</i>     | Diterpene  | -                 | [74]     |
| <b>193</b> | Dictinol                                                                                                                                 | <i>D. dichotoma</i> var. <i>indica</i>     | Diterpene  | -                 | [76]     |
| <b>194</b> | Dictindiol                                                                                                                               | <i>D. dichotoma</i> var. <i>indica</i>     | Diterpene  | -                 | [76]     |
| <b>195</b> | Dictintriol                                                                                                                              | <i>D. dichotoma</i> var. <i>indica</i>     | Diterpene  | -                 | [76]     |
| <b>196</b> | Dictyotriol A                                                                                                                            | <i>D. dichotoma</i> var. <i>indica</i>     | Diterpene  | -                 | [77]     |
| <b>197</b> | Dictyotriol B                                                                                                                            | <i>D. dichotoma</i> var. <i>indica</i>     | Diterpene  | -                 | [77]     |
| <b>198</b> | Fucoxanthin                                                                                                                              | <i>D. dichotoma</i> var. <i>indica</i>     | Carotenoid | Antiproliferative | [78, 79] |
| <b>199</b> | Isoamijiol                                                                                                                               | <i>D. dichotoma</i> var. <i>linearis</i> . | Diterpene  | -                 | [82]     |
| <b>200</b> | 14-Deoxyamijiol                                                                                                                          | <i>D. dichotoma</i> var. <i>linearis</i>   | Diterpene  | -                 | [82]     |
| <b>201</b> | Amijitrienol                                                                                                                             | <i>D. dichotoma</i> var. <i>linearis</i>   | Diterpene  | -                 | [83]     |
| <b>202</b> | 14-Deoxyisoamijiol                                                                                                                       | <i>D. dichotoma</i> var. <i>linearis</i>   | Diterpene  | -                 | [83]     |
| <b>203</b> | 4-Acetoxy-9,14-dihydroxydolastadiene                                                                                                     | <i>D. dichotoma</i> var. <i>linearis</i>   | Diterpene  | -                 | [84]     |
| <b>204</b> | 14-Hydroxydolasta-1(15),7,9-triene                                                                                                       | <i>D. dichotoma</i> var. <i>linearis</i>   | Diterpene  | -                 | [84]     |
| <b>205</b> | 4,9,14-Trihydroxydolasta-1(15),7-diene                                                                                                   | <i>D. dichotoma</i> var. <i>linearis</i>   | Diterpene  | -                 | [84]     |
| <b>206</b> | 4,7,14-Trihydroxydolasta-1(15),8-diene                                                                                                   | <i>D. dichotoma</i> var. <i>linearis</i>   | Diterpene  | -                 | [84]     |
| <b>207</b> | 4,6-Diacetoxy-14-hydroxydolastadiene                                                                                                     | <i>D. dichotoma</i> var. <i>linearis</i>   | Diterpene  | -                 | [84]     |
| <b>208</b> | Isopachydictyolal                                                                                                                        | <i>D. dichotoma</i> var. <i>linearis</i>   | Diterpene  | Antiviral         | [85]     |
| <b>209</b> | 4 $\alpha$ -Acetyl dictyodial                                                                                                            | <i>D. dichotoma</i> var. <i>lineari</i> .  | Diterpene  | Antiviral         | [85]     |
| <b>210</b> | 2-Methyl-6-[(2S,3 $\alpha$ S,4R,5S,7R,8 $\alpha$ R)-2,4,7-trihydroxy-3,8-dimethylidenedecahydroazulen-5-yl]hept-2-ene-4,5-diyl diacetate | <i>D. dichotoma</i> var. <i>volubilis</i>  | Diterpene  | -                 | [86]     |



|            |                                                                                                                                                                                                                          |                                           |           |   |      |
|------------|--------------------------------------------------------------------------------------------------------------------------------------------------------------------------------------------------------------------------|-------------------------------------------|-----------|---|------|
| <b>211</b> | 6-Methyl-2-[(2 <i>S</i> ,3 <i>αS</i> ,4 <i>R</i> ,5 <i>S</i> ,7 <i>R</i> ,8 <i>αR</i> )-2,4,7-trihydroxy-3,8-dimethylidenedecahydroazulen-5-yl]hept-5-en-3-yl acetate                                                    | <i>D. dichotoma</i> var. <i>volubilis</i> | Diterpene | - | [86] |
| <b>212</b> | 2-Methyl-6-[(3 <i>αR</i> ,4 <i>R</i> ,5 <i>S</i> ,7 <i>R</i> ,8 <i>αR</i> )-3,4,7-trihydroxy-3-methyl-8-methylidene-3,3 <i>α</i> ,4,5,6,7,8,8 <i>α</i> -octahydroazulen-5-yl]hept-2-ene-4,5-diyl diacetate               | <i>D. dichotoma</i> var. <i>volubilis</i> | Diterpene | - | [86] |
| <b>213</b> | 6-[(3 <i>αR</i> ,4 <i>R</i> ,5 <i>S</i> ,8 <i>αR</i> )-3,4-Dihydroxy-3-methyl-8-methylidene-3,3 <i>α</i> ,4,5,6,7,8,8 <i>α</i> -octahydroazulen-5-yl]-2-methylhept-2-en-4-yl acetate                                     | <i>D. dichotoma</i> var. <i>volubilis</i> | Diterpene | - | [86] |
| <b>214</b> | 2-[(3 <i>αS</i> ,4 <i>R</i> ,5 <i>S</i> ,7 <i>R</i> ,8 <i>αR</i> )-4,7-Dihydroxy-3-methyl-8-methylidene-1,3 <i>α</i> ,4,5,6,7,8,8 <i>α</i> -octahydroazulen-5-yl]-5-hydroxy-6-methylhept-6-en-3-yl acetate               | <i>D. dichotoma</i> var. <i>volubilis</i> | Diterpene | - | [86] |
| <b>215</b> | 6-[(3 <i>αS</i> ,4 <i>R</i> ,5 <i>S</i> ,7 <i>R</i> ,8 <i>αR</i> )-4-(Acetyloxy)-7-hydroxy-3-methyl-8-methylidene-1,3 <i>α</i> ,4,5,6,7,8,8 <i>α</i> -octahydroazulen-5-yl]-2-methylhept-2-ene-4,5-diyl diacetate        | <i>D. dichotoma</i> var. <i>volubilis</i> | Diterpene | - | [87] |
| <b>216</b> | 6-[(3 <i>αS</i> ,4 <i>R</i> ,5 <i>S</i> ,7 <i>R</i> ,8 <i>αR</i> )-4,7-Dihydroxy-3-methyl-8-methylidene-1,3 <i>α</i> ,4,5,6,7,8,8 <i>α</i> -octahydroazulen-5-yl]-2-methylhept-2-ene-4,5-diyl diacetate                  | <i>D. dichotoma</i> var. <i>volubilis</i> | Diterpene | - | [87] |
| <b>217</b> | (4 <i>E</i> )-2-[(3 <i>αS</i> ,4 <i>R</i> ,5 <i>S</i> ,7 <i>R</i> ,8 <i>αR</i> )-4,7-Dihydroxy-3-methyl-8-methylidene-1,3 <i>α</i> ,4,5,6,7,8,8 <i>α</i> -octahydroazulen-5-yl]-6-hydroxy-6-methylhept-4-en-3-yl acetate | <i>D. dichotoma</i> var. <i>volubilis</i> | Diterpene | - | [87] |
| <b>218</b> | 6-Methyl-2-[(3 <i>αR</i> ,4 <i>R</i> ,5 <i>S</i> ,7 <i>R</i> ,8 <i>αR</i> )-3,4,7-trihydroxy-3-methyl-8-methylidene-3,3 <i>α</i> ,4,5,6,7,8,8 <i>α</i> -octahydroazulen-5-yl]hept-5-en-3-yl acetate                      | <i>D. dichotoma</i> var. <i>volubilis</i> | Diterpene | - | [87] |
| <b>219</b> | Dilophol                                                                                                                                                                                                                 | <i>D. dichotoma</i> var. <i>volubilis</i> | Diterpene | - | [87] |

|     |                                                                                                            |                       |           |                                  |       |
|-----|------------------------------------------------------------------------------------------------------------|-----------------------|-----------|----------------------------------|-------|
| 220 | Neodictyolactone                                                                                           | <i>D. fasciola</i>    | Diterpene | -                                | [92]  |
| 221 | 18-Hydroxy-2,7-dolabelladiene                                                                              | <i>D. fasciola</i>    | Diterpene | -                                | [92]  |
| 222 | Secospatane                                                                                                | <i>D. fenestrata</i>  | Diterpene | -                                | [93]  |
| 223 | 2-Acetoxy-13(15),17-dien-10-ol                                                                             | <i>D. fenestrata</i>  | Diterpene | -                                | [93]  |
| 224 | Dolabelladienetriol                                                                                        | <i>D. friabilis</i>   | Diterpene | Antiviral                        | [94]  |
| 225 | Pachydictyol-A epoxide                                                                                     | <i>D. furcellata</i>  | Diterpene | -                                | [95]  |
| 226 | Dictyodiol                                                                                                 | <i>D. furcellata</i>  | Diterpene | -                                | [96]  |
| 227 | 6,7-Diacetoxydolasta-1(15),8-dien-14-ol                                                                    | <i>D. furcellata</i>  | Diterpene | -                                | [98]  |
| 228 | Hauckiosterol                                                                                              | <i>D. hauckiana</i>   | Sterol    | -                                | [100] |
| 229 | Hydroxydilophol                                                                                            | <i>D. masonii</i>     | Diterpene | -                                | [102] |
| 230 | Dictyol K                                                                                                  | <i>D. menstrualis</i> | Diterpene | Anti-inflammatory, Antimicrobial | [103] |
| 231 | Dictyol M                                                                                                  | <i>D. menstrualis</i> | Diterpene | Anti-inflammatory,               | [103] |
| 232 | Dictyol N                                                                                                  | <i>D. menstrualis</i> | Diterpene | Antimicrobial                    | [103] |
| 233 | Isoacetoxycrenulatin                                                                                       | <i>D. menstrualis</i> | Diterpene | Anti-inflammatory,               | [103] |
| 234 | 4-Hydroxycrenulide                                                                                         | <i>D. menstrualis</i> | Diterpene | Antimicrobial                    | [103] |
| 235 | (6 <i>R</i> )-6-Hydroxydichotoma-3,14-diene-1,17-dial                                                      | <i>D. menstrualis</i> | Diterpene | Antiviral                        | [104] |
| 236 | (6 <i>R</i> )-6-Acetoxidichotoma-3,14-diene-1,17-dial                                                      | <i>D. menstrualis</i> | Diterpene | Antiviral                        | [104] |
| 237 | Dichotomanol                                                                                               | <i>D. menstrualis</i> | Diterpene | Anticoagulant, Antiviral         | [105] |
| 238 | 8,10,18-Trihydroxy-2,6-dolabelladiene                                                                      | <i>D. menstrualis</i> | Diterpene | Antiviral                        | [106] |
| 239 | Dictyol L                                                                                                  | <i>D. pinnatifida</i> | Diterpene | Antimicrobial                    | [113] |
| 240 | 6-Epipachydictyol A                                                                                        | <i>D. pinnatifida</i> | Diterpene | Anti-microbial                   | [113] |
| 241 | 6-Epidictyol C                                                                                             | <i>D. pinnatifida</i> | Diterpene | Anti-microbial                   | [113] |
| 242 | 18-Acetoxy-xenianol                                                                                        | <i>D. pinnatifida</i> | Diterpene | Anti-microbial                   | [113] |
| 243 | 4 $\alpha$ -Hydroxyisodictyohemiacetal                                                                     | <i>D. plectens</i>    | Diterpene | Antiviral                        | [114] |
| 244 | 4 $\alpha$ -Hydroxyisodictyoacetal                                                                         | <i>D. plectens</i>    | Diterpene | Antiviral                        | [114] |
| 245 | 13,18-Diacetoxy-4-hydroxyisodictyo-19-al                                                                   | <i>D. plectens</i>    | Diterpene | Antiviral                        | [114] |
| 246 | 4 $\alpha$ -Hydroxypachylactone                                                                            | <i>D. plectens</i>    | Diterpene | Antiviral                        | [114] |
| 247 | Isodictyohemiacetal                                                                                        | <i>D. plectens</i>    | Diterpene | Antiviral                        | [114] |
| 248 | Isodictyoacetal                                                                                            | <i>D. plectens</i>    | Diterpene | Antiviral                        | [114] |
| 249 | (2 <i>S</i> ,3 <i>S</i> ,4 <i>R</i> ,10 <i>R</i> ,19 <i>R</i> )-19-Deoxy-4-hydroxy-19-methoxydictyolactone | <i>D. plectens</i>    | Diterpene | Antiviral                        | [114] |
| 250 | 4-Hydroxydictyolactone                                                                                     | <i>D. plectens</i>    | Diterpene | Antiviral                        | [114] |

|            |                                                                                                                                                |                     |           |                                        |       |
|------------|------------------------------------------------------------------------------------------------------------------------------------------------|---------------------|-----------|----------------------------------------|-------|
| <b>251</b> | (1 <i>S</i> ,2 <i>S</i> ,3 <i>E</i> ,5 <i>Z</i> ,7 <i>E</i> ,11 <i>R</i> ,12 <i>R</i> )-2-Acetoxy-12-hydroxydolabella-3,5,7-trien-9-one        | <i>D. plectens</i>  | Diterpene | -                                      | [115] |
| <b>252</b> | (1 <i>S</i> ,2 <i>S</i> ,3 <i>E</i> ,5 <i>Z</i> ,7 <i>Z</i> ,11 <i>R</i> ,12 <i>R</i> )-2-Acetoxy-12-hydroxydolabella-3,5,7-trien-9-one        | <i>D. plectens</i>  | Diterpene | -                                      | [115] |
| <b>253</b> | (1 <i>S</i> ,2 <i>S</i> ,3 <i>S</i> ,4 <i>Z</i> ,6 <i>Z</i> ,8 <i>R</i> ,11 <i>R</i> ,12 <i>R</i> )-2-Acetoxy-12-hydroxydolasta-4,6-dien-9-one | <i>D. plectens</i>  | Diterpene | -                                      | [115] |
| <b>254</b> | 9 $\alpha$ -Hydroxydictyol E                                                                                                                   | <i>D. plectens</i>  | Diterpene | -                                      | [115] |
| <b>255</b> | Isodictyol E                                                                                                                                   | <i>D. plectens</i>  | Diterpene | -                                      | [115] |
| <b>256</b> | 3 $\beta$ -Acetoxydilophol                                                                                                                     | <i>D. plectens</i>  | Diterpene | -                                      | [115] |
| <b>257</b> | 19-Acetyl-4-hydroxydictyodiol                                                                                                                  | <i>D. plectens</i>  | Diterpene | -                                      | [115] |
| <b>258</b> | Hydroxydictyodial                                                                                                                              | <i>D. spinulosa</i> | Diterpene | Antifeedant                            | [118] |
| <b>259</b> | Spiralyde A                                                                                                                                    | <i>D. spiralis</i>  | Diterpene | Anti-leishmanial,<br>Anti-trypanosomal | [119] |
| <b>260</b> | (1 <i>R</i> ,3 <i>S</i> ,4 <i>S</i> ,7 <i>E</i> ,11 <i>S</i> ,12 <i>S</i> )-3,4-Epoxy-7,18-dolabelladiene                                      | <i>D. spiralis</i>  | Diterpene | Anti-leishmanial,<br>Anti-trypanosomal | [119] |
| <b>261</b> | (1 <i>R</i> ,3 <i>S</i> ,4 <i>S</i> ,7 <i>E</i> ,11 <i>S</i> ,12 <i>S</i> ,14 <i>S</i> )-3,4-Epoxy-14-hydroxy-7,18-dolabelladiene              | <i>D. spiralis</i>  | Diterpene | Anti-leishmanial,<br>Anti-trypanosomal | [119] |
| <b>262</b> | (1 <i>R</i> ,3 <i>S</i> ,4 <i>S</i> ,7 <i>E</i> ,11 <i>S</i> ,12 <i>S</i> )-3,4-Epoxy-14-oxo-7,18-dolabelladiene                               | <i>D. spiralis</i>  | Diterpene | Anti-leishmanial,<br>Anti-trypanosomal | [119] |
| <b>263</b> | (1 <i>R</i> ,3 <i>E</i> ,7 <i>E</i> ,11 <i>S</i> ,12 <i>S</i> )-14-Oxo-3,7,18-dolabellatriene                                                  | <i>D. spiralis</i>  | Diterpene | Anti-leishmanial,<br>Anti-trypanosomal | [119] |
| <b>264</b> | (1 <i>R</i> ,3 <i>Z</i> ,7 <i>E</i> ,11 <i>S</i> ,12 <i>S</i> )-14-Oxo-3,7,18-dolabellatriene                                                  | <i>D. spiralis</i>  | Diterpene | Anti-leishmanial,<br>Anti-trypanosomal | [119] |
| <b>265</b> | Dolabellane                                                                                                                                    | <i>Dictyota sp.</i> | Diterpene | -                                      | [120] |
| <b>266</b> | Xenicane                                                                                                                                       | <i>Dictyota sp.</i> | Diterpene | -                                      | [120] |
| <b>267</b> | Prenylated guaiane                                                                                                                             | <i>Dictyota sp.</i> | Diterpene | -                                      | [120] |
| <b>268</b> | 3,4-Epoxy-14-oxo-7,18-dolabelladiene                                                                                                           | <i>Dictyota sp.</i> | Diterpene | Antimicrobial                          | [120] |
| <b>269</b> | Acetoxycrenulide                                                                                                                               | <i>Dictyota sp.</i> | Diterpene | Antimicrobial                          | [120] |
| <b>270</b> | 10,18-Dihydroxydolabella-2,7-diene                                                                                                             | <i>Dictyota sp.</i> | Diterpene | -                                      | [120] |
| <b>271</b> | 10-Acetoxy-18-hydroxydolabella-2,7-diene                                                                                                       | <i>Dictyota sp.</i> | Diterpene | Antimicrobial                          | [120] |
| <b>272</b> | 1- <i>O</i> -Octadecenoylglycerol                                                                                                              | <i>Dictyota sp.</i> | Diterpene | Antimicrobial                          | [120] |
| <b>273</b> | sn-3- <i>O</i> -(Geranylgeranyl)glycerol                                                                                                       | <i>Dictyota sp.</i> | Diterpene | Antimicrobial                          | [120] |
| <b>274</b> | Dictyotadimer A                                                                                                                                | <i>Dictyota sp.</i> | Diterpene | -                                      | [121] |
| <b>275</b> | Joalin                                                                                                                                         | <i>Dictyota sp.</i> | Diterpene | -                                      | [122] |
| <b>276</b> | 16-Acetoxy-1 <i>R</i> ,11 <i>S</i> ,12 <i>R</i> -dolabella-triene                                                                              | <i>Dictyota sp.</i> | Diterpene | -                                      | [123] |

|            |                                                                            |                     |           |   |       |
|------------|----------------------------------------------------------------------------|---------------------|-----------|---|-------|
| <b>277</b> | 3 <i>S</i> -Acetoxy-1 <i>R</i> ,11 <i>S</i> ,12 <i>R</i> -dolabella-triene | <i>Dictyota sp.</i> | Diterpene | - | [123] |
| <b>278</b> | Dictyotriol C                                                              | <i>Dictyota sp.</i> | Diterpene | - | [124] |
| <b>279</b> | Dictyotriol D                                                              | <i>Dictyota sp.</i> | Diterpene | - | [124] |
| <b>280</b> | Dictyotriol E                                                              | <i>Dictyota sp.</i> | Diterpene | - | [124] |
| <b>281</b> | $\alpha$ -Dictalediol monoacetate                                          | <i>Dictyota sp.</i> | Diterpene | - | [125] |

**Table S2:** Biological assays related to therapeutic potential of *Dictyota* extracts

| <b>No.</b> | <b>Name</b>                                              | <b>Species</b>                                                                                              | <b>Activity</b>                                     | <b>References</b> |
|------------|----------------------------------------------------------|-------------------------------------------------------------------------------------------------------------|-----------------------------------------------------|-------------------|
| <b>1</b>   | Chloroform and acetone extract                           | <i>D. acutiloba</i>                                                                                         | Antimicrobial                                       | [12]              |
| <b>2</b>   | Methanol and hexane extract                              | <i>D. acutiloba</i>                                                                                         | -                                                   | [12]              |
| <b>3</b>   | Aqueous extract                                          | <i>D. bartayresiana</i>                                                                                     | Antifungal                                          | [14]              |
| <b>4</b>   | Methanol extract                                         | <i>D. bartayresiana</i>                                                                                     | Antimicrobial                                       | [15]              |
| <b>5</b>   | Methanol extract                                         | <i>D. bartayresiana</i>                                                                                     | Larvicidal                                          | [15]              |
| <b>6</b>   | Methanol extract                                         | <i>D. bartayresiana</i>                                                                                     | Antioxidant                                         | [16]              |
| <b>7</b>   | SiO <sub>2</sub> -ZnO nanoparticles                      | <i>D. bartayresiana</i>                                                                                     | Antimicrobial,<br>Antiproliferative                 | [17]              |
| <b>8</b>   | Sulfated polysaccharides                                 | <i>D. caribaea</i>                                                                                          | Antiproliferative,<br>Immunostimulatory             | [19, 20]          |
| <b>9</b>   | Ethanol extract                                          | <i>D. coriacea</i>                                                                                          | Hypopigmentation                                    | [27]              |
| <b>10</b>  | Hexane and ethyl acetate fractions                       | <i>D. coriacea</i>                                                                                          | Anti-alopecia                                       | [28]              |
| <b>11</b>  | Ethanol extract                                          | <i>D. coriacea</i>                                                                                          | Anti-inflammatory                                   | [29]              |
| <b>12</b>  | Polysaccharides                                          | <i>D. dichotoma</i>                                                                                         | Antiproliferative,<br>Immunomodulator,<br>Antiviral | [36-38]           |
| <b>13</b>  | Ethanol extract                                          | <i>D. dichotoma</i>                                                                                         | Larvicidal,<br>Antioxidant                          | [39, 42]          |
| <b>14</b>  | Chloroform fraction                                      | <i>D. dichotoma</i>                                                                                         | Antioxidant<br>Antiproliferative                    | [42]              |
| <b>15</b>  | Dichloromethane extract                                  | <i>D. dichotoma</i>                                                                                         | Antioxidant                                         | [65]              |
| <b>16</b>  | Palladium oxide nanoparticles                            | <i>D. dichotoma</i> var. <i>indica</i>                                                                      | -                                                   | [79]              |
| <b>17</b>  | Gold nanoparticles                                       | <i>D. dichotoma</i>                                                                                         | Antimicrobial                                       | [81]              |
| <b>18</b>  | Methanol extract                                         | <i>D. dichotoma</i> var. <i>divaricata</i><br><i>D. dichotoma</i> var. <i>linearis</i>                      | Cytotoxic                                           | [84]              |
| <b>19</b>  | Aqueous and ethanolic extracts                           | <i>D. dichotoma</i>                                                                                         | Antioxidant,<br>Plant growth promotion              | [88, 89]          |
| <b>20</b>  | Methanol extract                                         | <i>D. dichotoma</i> var. <i>intricata</i> ,<br><i>D. dichotoma</i> var. <i>indica</i> ,<br><i>D. dumosa</i> | Antimicrobial                                       | [90]              |
| <b>21</b>  | Dichloromethane and<br>dichloromethane/methanol extracts | <i>D. fasciola</i>                                                                                          | Antimicrobial                                       | [92]              |
| <b>22</b>  | <i>n</i> -Butanol extract                                | <i>D. flabellate</i>                                                                                        | Antimicrobial,<br>Antioxidant                       | [97]              |

|    |                                           |                                                                 |                                                              |            |
|----|-------------------------------------------|-----------------------------------------------------------------|--------------------------------------------------------------|------------|
| 23 | Ethanol extract                           | <i>D. dichotoma</i> var. <i>indica</i> ,<br><i>D. hauckiana</i> | Larvicidal                                                   | [101]      |
| 24 | Dichloromethane/methanol-soluble fraction | <i>D. menstrualis</i>                                           | Antiviral                                                    | [104]      |
| 25 | Methanol extract                          | <i>D. cilliolata</i> ,<br><i>D. menstrualis</i>                 | Antiproliferative                                            | [107]      |
| 26 | Sulfated polysaccharides                  | <i>D. menstrualis</i>                                           | Anticoagulant,<br>Antinociceptive,<br>Anti-inflammatory      | [108, 109] |
| 27 | Dichloromethane extract                   | <i>D. menstrualis</i>                                           | Antiviral                                                    | [110]      |
| 28 | Sulfated polysaccharides                  | <i>D. mertensii</i>                                             | Antiproliferative,<br>Immunomodulatory,<br>Anti-inflammatory | [111]      |
| 29 | Dichloromethane methanol extract          | <i>D. pulchella</i>                                             | Cardioprotective                                             | [116]      |
| 30 | Dichloromethane extract                   | <i>D. spiralis</i>                                              | Anti-leishmanial,<br>Anti-trypanosomal                       | [119]      |
| 31 | Organic extract                           | <i>D. spiralis</i>                                              | Anti-leishmanial,<br>Anti-trypanosomal                       | [126]      |
| 32 | Organic extract                           | <i>Dictyota</i> sp.                                             | Antioxidant,<br>Neuroprotective                              | [127]      |
